# Supplementary material for: Does BMI Modify the Association between Vitamin D and Pulmonary Function in Children of the Mild Asthma Phenotype?
Source: MDPI journal article supplement (doi:10.3390/ijerph192416768), 2022-12-14
Supplement: s1 [file s1]

## ONLINE SUPPLEMENT

### SUPPLEMENTAL (Table S1)

**Table S1.** Population characteristics per sex.

|                                    | <b>Males<br/>(n= 30)</b> | <b>Females<br/>(n= 31)</b> |                      |
|------------------------------------|--------------------------|----------------------------|----------------------|
| <b>Variables</b>                   | <b>Mean (SD)</b>         | <b>Mean (SD)</b>           | <b>P<sup>a</sup></b> |
| Age (years)                        | 7.93 (2.33)              | 8.10 (2.21)                | 0.85 <sup>b</sup>    |
| BMI (kg/m <sup>2</sup> )           | 19.00 (3.87)             | 18.43 (3.65)               | 0.49 <sup>b</sup>    |
| BMI categories                     |                          |                            |                      |
| Normal weight                      | 60.0%(18)                | 54.8%(17)                  | 0.68 <sup>c</sup>    |
| Overweight/Obese                   | 40.0%(12)                | 45.2%(14)                  |                      |
| Regular exercise (≥ 3x/week) % (n) | 53.3%(16)                | 45.2%(14)                  | 0.52 <sup>c</sup>    |
| Medication therapy : Yes % (n)     | 76.7%(23)                | 87.1%(27)                  | 0.29 <sup>c</sup>    |
| <b>PFTs</b>                        |                          |                            |                      |
| %FVC*                              | 95.93 (10.52)            | 95.23 (9.07)               | 0.78                 |
| %FEV <sub>1</sub>                  | 99.33 (9.63)             | 97.29 (10.22)              | 0.42                 |
| % FEV <sub>1</sub> /FVC            | 103.03 (5.83)            | 101.29 (6.30)              | 0.43 <sup>b</sup>    |
| % PEF                              | 94.73 (14.65)            | 90.61 (18.51)              | 0.19 <sup>b</sup>    |
| % FEF <sub>25-75%</sub>            | 104.40 (17.55)           | 99.74 (21.42)              | 0.36                 |
| FeNO (ppb)                         | 13.10 (14.70)            | 15.13 (13.39)              | 0.35 <sup>b</sup>    |
| 25(OH) D (ng/mL)                   | 24.95 (8.86)             | 21.38 (4.63)               | 0.09 <sup>b</sup>    |
| 25(OH) D levels                    |                          |                            |                      |
| < 20 ng/mL (deficient) % (n)       | 20.0%(6)                 | 38.7% (12)                 | 0.09 <sup>c</sup>    |
| 20-30 ng/mL (insufficient) % (n)   | 63.3%(19)                | 58.1%(18)                  |                      |
| ≥ 30 ng/mL (sufficient) % (n)      | 16.7%(5)                 | 3.23%(1)                   |                      |

Total N = 61

Continuous variables presented as mean (SD) and categorical, as percentage % (n)

<sup>a</sup>P- P-value estimated using T-test; <sup>b</sup> Mann-Whitney U test; <sup>c</sup> Chi Square test

\*Percent predicted pre-bronchodilator administration

Key: PFTs- Pulmonary Function Tests, FEV<sub>1</sub>- Forced Expiratory Volume in 1 second, FVC- Forced Vital Capacity, FEV<sub>1</sub>/FVC- ratio of Forced Expiratory Volume in 1 second and Forced Vital Capacity, PEF- Peak Expiratory Flow, FEF<sub>25-75%</sub>-Forced Expiratory Flow at 25-75% of the pulmonary volume, FeNO- Fractional exhaled Nitric Oxide
